# Supplementary material for: Why does the niclosamide drug form solvates or hydrates?
Source: Royal Society of Chemistry journal article supplement (doi:10.1039/d4ce00463a), 2024-01-01
Supplement: d4ce00463a1.pdf [file d4ce00463a1.pdf]

## Electronic Supplementary Information (ESI)

### Why does niclosamide drug form solvates or hydrates?

Prasitaditya Kuri<sup>a,b</sup> and Jagadeesh Babu Nanubolu<sup>\*ab</sup>

<sup>a</sup>Centre for X-ray Crystallography, Department of Analytical & Structural Chemistry, CSIR-Indian Institute of Chemical Technology, Tarnaka, Uppal Road, Hyderabad-500007, Telangana, India. <sup>b</sup>Academy of Scientific and Innovative Research (AcSIR), Ghaziabad, 201002, India

\*Corresponding Author

E-mail Ids: [jagadeesh81@gmail.com](mailto:jagadeesh81@gmail.com), [njbabu@iict.res.in](mailto:njbabu@iict.res.in)

### Table of Contents

| S.No | Table/Fig No    | Description                                                                                                                             | Page No. |
|------|-----------------|-----------------------------------------------------------------------------------------------------------------------------------------|----------|
| 1    | Table S1        | Crystal data                                                                                                                            | 2        |
| 2    | Table S2        | Significant hydrogen bond interactions.                                                                                                 | 3        |
| 3    | Table S3        | Torsion angles in the planar conformation of NIC.                                                                                       | 4        |
| 4    | Table S4        | Desolvation and melting onset temperatures from DSC analysis.                                                                           | 5        |
| 5    | Table S5        | Theoretical and experimental weight loss of solvates in TGA.                                                                            | 5        |
| 6    | Table S6        | Desolvation and melting ranges as captured by HSM.                                                                                      | 5        |
| 7    | Table S7        | Crystal packing coefficients and crystal densities.                                                                                     | 6        |
| 8    | Table S8        | O-H...O/N interaction energies and its corresponding energy decomposition.                                                              | 7        |
| 9    | Table S9        | Intermolecular energies of six NIC solvates and their energy decomposition.                                                             | 8-9      |
| 10   | Table S10       | Energy contribution of the drug and solvent in the NIC anhydrous and solvate crystal structures.                                        | 10       |
| 11   | Figures S1-S5   | Crystal packing diagrams of niclosamide solvates                                                                                        | 11-14    |
| 12   | Figure S6       | TGA plots of NIC-monohydrate, NIC-NNDMA (1:1), NIC-NNDMA (2:2) and NIC-DOX (1:0.5)                                                      | 15       |
| 13   | Figures S7-S10  | Hot Stage Microscopy (HSM) analysis of NIC-DMF, NIC-DMSO, NIC-NNDMA (1:1), NIC-NNDMA (2:2) systems                                      | 16-18    |
| 14   | Figures S11-S14 | Prominent interactions in the different dimers of NIC solvate crystal structures and their associated energies (kJ.mol <sup>-1</sup> ). | 19-21    |
| 15   | Figure S15      | Hirshfeld surface maps of solvent molecules in NIC solvates, mapped with the $d_{\text{norm}}$ property.                                | 22       |

**Table S1.** Crystal data of niclosamide solvate forms

| Compound code                                                                          | NIC-DMF (1:1)                                                                                                       | NIC-DMSO (1:1)                                                                                                      | NIC-NN DMA (1:1)                                                                                                    | NIC-N,N DMA (2:2)                                                                                                   | NIC-DOX (1:0.5)                                                                                                                      | NIC-DOX (2:1.5)                                                                                                                         |
|----------------------------------------------------------------------------------------|---------------------------------------------------------------------------------------------------------------------|---------------------------------------------------------------------------------------------------------------------|---------------------------------------------------------------------------------------------------------------------|---------------------------------------------------------------------------------------------------------------------|--------------------------------------------------------------------------------------------------------------------------------------|-----------------------------------------------------------------------------------------------------------------------------------------|
| Chemical formula                                                                       | C <sub>13</sub> H <sub>8</sub> Cl <sub>2</sub> N <sub>2</sub> O <sub>4</sub> ,<br>C <sub>3</sub> H <sub>7</sub> N O | C <sub>13</sub> H <sub>8</sub> Cl <sub>2</sub> N <sub>2</sub> O <sub>4</sub> ,<br>C <sub>2</sub> H <sub>6</sub> O S | C <sub>13</sub> H <sub>8</sub> Cl <sub>2</sub> N <sub>2</sub> O <sub>4</sub> ,<br>C <sub>4</sub> H <sub>9</sub> N O | C <sub>13</sub> H <sub>8</sub> Cl <sub>2</sub> N <sub>2</sub> O <sub>4</sub> ,<br>C <sub>4</sub> H <sub>9</sub> N O | C <sub>13</sub> H <sub>8</sub> Cl <sub>2</sub> N <sub>2</sub> O <sub>4</sub> ,<br>0.5(C <sub>4</sub> H <sub>8</sub> O <sub>2</sub> ) | 2(C <sub>13</sub> H <sub>8</sub> Cl <sub>2</sub> N <sub>2</sub> O <sub>4</sub> ),<br>1.5(C <sub>4</sub> H <sub>8</sub> O <sub>2</sub> ) |
| Formula Mass                                                                           | 400.21                                                                                                              | 405.24                                                                                                              | 414.23                                                                                                              | 414.23                                                                                                              | 371.17                                                                                                                               | 786.38                                                                                                                                  |
| Crystal system                                                                         | Monoclinic                                                                                                          | Monoclinic                                                                                                          | Monoclinic                                                                                                          | Triclinic                                                                                                           | Triclinic                                                                                                                            | Triclinic                                                                                                                               |
| <i>a</i> /Å                                                                            | 3.9865(6)                                                                                                           | 16.821(16)                                                                                                          | 10.3963(4)                                                                                                          | 7.4340(8)                                                                                                           | 7.5264(10)                                                                                                                           | 11.4503(5)                                                                                                                              |
| <i>b</i> /Å                                                                            | 37.612(5)                                                                                                           | 11.538(10)                                                                                                          | 20.4099(7)                                                                                                          | 14.1832(16)                                                                                                         | 9.7054(12)                                                                                                                           | 12.5985(5)                                                                                                                              |
| <i>c</i> /Å                                                                            | 11.9718(15)                                                                                                         | 9.082(8)                                                                                                            | 9.9364(4)                                                                                                           | 18.431(2)                                                                                                           | 11.9792(14)                                                                                                                          | 14.5875(7)                                                                                                                              |
| <i>α</i> /°                                                                            | 90                                                                                                                  | 90                                                                                                                  | 90                                                                                                                  | 100.902(3)                                                                                                          | 69.028(4)                                                                                                                            | 66.0849(14)                                                                                                                             |
| <i>β</i> /°                                                                            | 95.365(10)                                                                                                          | 95.92(2)                                                                                                            | 117.1041(18)                                                                                                        | 100.288(4)                                                                                                          | 85.313(4)                                                                                                                            | 87.5929(15)                                                                                                                             |
| <i>γ</i> /°                                                                            | 90                                                                                                                  | 90                                                                                                                  | 90                                                                                                                  | 91.378(4)                                                                                                           | 77.701(4)                                                                                                                            | 64.4525(12)                                                                                                                             |
| Unit cell volume/Å <sup>3</sup>                                                        | 1787.2(4)                                                                                                           | 1753(3)                                                                                                             | 1876.84(13)                                                                                                         | 1874.2(4)                                                                                                           | 798.31(17)                                                                                                                           | 1712.94(13)                                                                                                                             |
| Temperature /K                                                                         | 293(2)                                                                                                              | 293(2)                                                                                                              | 293(2)                                                                                                              | 293(2)                                                                                                              | 293(2)                                                                                                                               | 293(2)                                                                                                                                  |
| Space group                                                                            | <i>P</i> 21/ <i>n</i>                                                                                               | <i>P</i> 21/ <i>c</i>                                                                                               | <i>P</i> 21/ <i>c</i>                                                                                               | <i>P</i> 1                                                                                                          | <i>P</i> 1                                                                                                                           | <i>P</i> 1                                                                                                                              |
| Formula units per unit cell, <i>Z</i>                                                  | 4                                                                                                                   | 4                                                                                                                   | 4                                                                                                                   | 4                                                                                                                   | 2                                                                                                                                    | 2                                                                                                                                       |
| Radiation type                                                                         | MoK $\alpha$                                                                                                                         | MoK $\alpha$                                                                                                                            |
| Crystal size /mm <sup>3</sup>                                                          | 0.40×0.18×0.12                                                                                                      | 0.32×0.15×0.11                                                                                                      | 0.40×0.18×0.12                                                                                                      | 0.39×0.11×0.15                                                                                                      | 0.42×0.11×0.12                                                                                                                       | 0.33×0.19×0.11                                                                                                                          |
| Absorption coefficient, $\mu$ /mm <sup>-1</sup>                                        | 0.396                                                                                                               | 0.518                                                                                                               | 0.380                                                                                                               | 0.381                                                                                                               | 0.435                                                                                                                                | 0.413                                                                                                                                   |
| No. of reflections measured                                                            | 12098                                                                                                               | 19293                                                                                                               | 23012                                                                                                               | 50878                                                                                                               | 14740                                                                                                                                | 31623                                                                                                                                   |
| No. of independent reflections                                                         | 3156                                                                                                                | 4002                                                                                                                | 4308                                                                                                                | 8604                                                                                                                | 3664                                                                                                                                 | 7828                                                                                                                                    |
| No. of independent reflections ( <i>I</i> >2 $\sigma$ ( <i>I</i> ))                    | 1870                                                                                                                | 2255                                                                                                                | 3010                                                                                                                | 3526                                                                                                                | 1987                                                                                                                                 | 4583                                                                                                                                    |
| <i>R</i> <sub>int</sub>                                                                | 0.0691                                                                                                              | 0.0472                                                                                                              | 0.0555                                                                                                              | 0.0970                                                                                                              | 0.0440                                                                                                                               | 0.0476                                                                                                                                  |
| Final <i>R</i> <i>I</i> values ( <i>I</i> > 2 $\sigma$ ( <i>I</i> ))                   | 0.0685                                                                                                              | 0.0413                                                                                                              | 0.0470                                                                                                              | 0.0519                                                                                                              | 0.0438                                                                                                                               | 0.0527                                                                                                                                  |
| Final <i>wR</i> ( <i>F</i> <sup>2</sup> ) values ( <i>I</i> > 2 $\sigma$ ( <i>I</i> )) | 0.1421                                                                                                              | 0.0916                                                                                                              | 0.1119                                                                                                              | 0.1146                                                                                                              | 0.0985                                                                                                                               | 0.1295                                                                                                                                  |
| Final <i>R</i> <i>I</i> values (all data)                                              | 0.1259                                                                                                              | 0.0972                                                                                                              | 0.0741                                                                                                              | 0.1641                                                                                                              | 0.1041                                                                                                                               | 0.1031                                                                                                                                  |
| Final <i>wR</i> ( <i>F</i> <sup>2</sup> ) values (all data)                            | 0.1648                                                                                                              | 0.1112                                                                                                              | 0.1317                                                                                                              | 0.1614                                                                                                              | 0.1258                                                                                                                               | 0.1671                                                                                                                                  |
| Goodness of fit on <i>F</i> <sup>2</sup>                                               | 1.041                                                                                                               | 1.025                                                                                                               | 1.052                                                                                                               | 1.005                                                                                                               | 1.014                                                                                                                                | 1.038                                                                                                                                   |
| Difference density max and min, e/Å <sup>3</sup>                                       | 0.299 and -0.202                                                                                                    | 0.215 and -0.242                                                                                                    | 0.305 and -0.226                                                                                                    | 0.246 and -0.217                                                                                                    | 0.187 and -0.240                                                                                                                     | 0.325 and -0.205                                                                                                                        |
| CCDC number                                                                            | <b>2352670</b>                                                                                                      | <b>2352671</b>                                                                                                      | <b>2352672</b>                                                                                                      | <b>2352673</b>                                                                                                      | <b>2352674</b>                                                                                                                       | <b>2352675</b>                                                                                                                          |

**Table S2.** Significant hydrogen bond interactions in niclosamide solvate forms.

| D-H...A                  | D-H / Å | H...A / Å | D...A / Å | <D-H...A / ° | Symmetry code   |
|--------------------------|---------|-----------|-----------|--------------|-----------------|
| <b>NIC-DMF (1:1)</b>     |         |           |           |              |                 |
| O2-H2O...O5              | 0.81(5) | 1.76(5)   | 2.569(5)  | 174(6)       |                 |
| C4-H4...O5               | 0.93    | 2.59      | 3.241(6)  | 127          |                 |
| C10-H10...O3             | 0.93    | 2.59      | 3.430(50) | 150          | 1-x,1-y,2-z     |
| C16-H16C...O1            | 0.96    | 2.59      | 3.548(6)  | 174          | x,y,-1+z        |
| <b>NIC-DMSO (1:1)</b>    |         |           |           |              |                 |
| O2-H2O...S1              | 0.92(2) | 2.80(2)   | 3.691(4)  | 163(2)       |                 |
| O2-H2O...O5              | 0.92(2) | 1.64(2)   | 2.546(5)  | 168(3)       |                 |
| O2-H2O...O5D             | 0.92(2) | 1.79(5)   | 2.70(4)   | 173(3)       |                 |
| C15-H15B...O5            | 0.96    | 2.62      | 3.448(6)  | 145          | x, 3/2-y, 1/2+z |
| <b>NIC-N,N DMA(1:1)</b>  |         |           |           |              |                 |
| O2-H2O...O5              | 0.81(3) | 1.76(3)   | 2.571(2)  | 178(3)       |                 |
| C4-H4...O5               | 0.93    | 2.54      | 3.205(3)  | 129          |                 |
| C16-H16...O3             | 0.96    | 2.51      | 3.325(3)  | 143          | 1+x,3/2-y,3/2+z |
| <b>NIC-N,N DMA (2:2)</b> |         |           |           |              |                 |
| O2A-H2AO...O5A           | 0.83(3) | 1.75(3)   | 2.577(3)  | 179(4)       |                 |
| O2B-H2BO...O5B           | 0.83(3) | 1.72(3)   | 2.545(6)  | 175(2)       |                 |
| O2B-H2BO...O5D           | 0.83(3) | 1.93(4)   | 2.75(3)   | 167(3)       |                 |
| C4A-H4A...O5A            | 0.93    | 2.52      | 3.187(4)  | 129          |                 |
| C4B-H4B...O5B            | 0.93    | 2.53      | 3.174(7)  | 127          |                 |
| C4B-H4B...O5D            | 0.93    | 2.43      | 3.12(2)   | 131          |                 |
| C10A-H10A...O1A          | 0.93    | 2.56      | 3.361(4)  | 144          | 2-x,-y,1-z      |
| C15A-H15A...O4A          | 0.96    | 2.36      | 3.181(4)  | 143          | 2-x,1-y,1-z     |
| C15A-H15B...C12A         | 0.96    | 2.74      | 3.531(3)  | 141          |                 |
| C15B-H15D...C12B         | 0.96    | 2.78      | 3.504(8)  | 133          |                 |
| C15B-H15F...O4B          | 0.96    | 2.57      | 3.315(9)  | 134          | 1-x,2-y,1-z     |
| C16B-H16F...O5D          | 0.96    | 2.00      | 2.48(3)   | 108          |                 |
| C17A-H17C...O3B          | 0.96    | 2.57      | 3.363(5)  | 140          |                 |
| <b>NIC-DOX (1:0.5)</b>   |         |           |           |              |                 |
| O2-H2O...O5              | 0.84(3) | 1.77(3)   | 2.589(3)  | 166(2)       |                 |
| C15-H15A...O4            | 0.97    | 2.51      | 3.167(6)  | 125          | 1-x,1-y,-z      |
| <b>NIC-DOX (2:1.5)</b>   |         |           |           |              |                 |
| O2A-H2AO...O5A           | 0.79(3) | 1.90(3)   | 2.675(6)  | 172(3)       |                 |
| O2A-H2AO...O5D           | 0.79(3) | 1.86(4)   | 2.63(3)   | 166(4)       |                 |
| O2B-H2BO...O6A           | 0.80(4) | 1.88(4)   | 2.668(5)  | 169(4)       |                 |
| O2B-H2BO...O6D           | 0.80(4) | 1.76(4)   | 2.49(2)   | 150(4)       |                 |
| C7A-H7A...C11B           | 0.93    | 2.80      | 3.720(3)  | 171          | -1+x,y,-1+z     |
| C17A-H17A...O4B          | 0.97    | 2.58      | 3.243(6)  | 125          | -x,1-y,1-z      |

|               |      |      |          |     |          |
|---------------|------|------|----------|-----|----------|
| C9B-H9B...O5B | 0.93 | 2.62 | 3.312(4) | 132 | x,y,-1+z |
|---------------|------|------|----------|-----|----------|

**Table S3.** Torsion angles in the planar conformation of NIC.

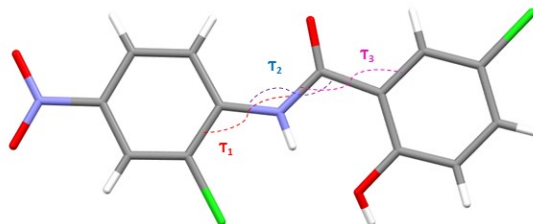

| S. No. | Crystal forms      | $\tau_1 / ^\circ$ | $\tau_2 / ^\circ$ | $\tau_3 / ^\circ$ |
|--------|--------------------|-------------------|-------------------|-------------------|
| 1.     | NIC-I              | -175.0(2)         | 176.3(1)          | 177.5(1)          |
| 2.     | NIC-II             | 177.7(2)          | -176.4(2)         | 177.8(2)          |
|        |                    | 177.5(2)          | -179.8(2)         | 179.8(2)          |
|        |                    | -179.9(2)         | 176.9(2)          | -177.0(2)         |
|        |                    | 179.7(2)          | 178.3(2)          | 177.8(2)          |
| 3.     | NIC-H <sub>A</sub> | 177.9(4)          | -177.3(4)         | -174.0(4)         |
| 4.     | NIC-H <sub>B</sub> | 173.9(2)          | 177.6(2)          | 178.6(2)          |
| 5.     | NIC-THF (1:1)      | 178.8(7)          | 177.7(7)          | -177.7(7)         |
| 6.     | NIC-MeCN (1:1)     | 177.2(4)          | -179.4(4)         | -171.3(4)         |
| 7.     | NIC-ACETONE(2:2)   | 172.2(6)          | -178.5(6)         | 178.9(6)          |
|        |                    | 174.6(6)          | -179.3(6)         | 177.4(6)          |
| 8.     | NIC-MeOH(1:1)      | -179.9(6)         | 177.4(5)          | 178.7(5)          |
| 9.     | NIC-TEG (2:1)      | 174.2(3)          | -178.3(3)         | -176.4(3)         |
|        |                    | 179.5(3)          | 178.8(3)          | 179.7(3)          |
| 10.    | NIC-DMF (1:1)      | 177.9(4)          | -179.9(4)         | -174.0(4)         |
| 11.    | NIC-DMSO (2:2)     | -178.3 (2)        | 179.2(2)          | 178.8(2)          |
| 12.    | NIC-N,N DMA (1:1)  | 179.1(2)          | -177.8(2)         | 177.5(2)          |
| 13.    | NIC-N, N DMA (2:2) | 175.6(3)          | -177.0(3)         | 176.2(2)          |
|        |                    | 178.5(3)          | -179.8(2)         | 177.7(2)          |
| 14.    | NIC-DOX (1:0.5)    | -176.8(2)         | 174.4(2)          | 176.8(2)          |
| 15.    | NIC-DOX (2:1.5)    | 179.9(2)          | -179.5(2)         | 176.2(2)          |
|        |                    | 177.6(2)          | -179.3(2)         | -180.0(2)         |

**Table S4.** Desolvation and melting onset temperatures from DSC analysis.

| <b>Forms</b>       | <b>Desolvation onset T (°C)</b> | <b>Melting onset T (°C)</b> |
|--------------------|---------------------------------|-----------------------------|
| NIC-H <sub>A</sub> | 83                              | 229                         |
| NIC-DMF            | 129                             | 229                         |
| NIC-DMSO           | 168                             | 229                         |
| NIC-NNDMA (1:1)    | 148                             | 229                         |
| NIC-NNDMA (2:2)    | 146                             | 229                         |
| NIC-DOX (1:0.5)    | 83 and 127                      | 229                         |

**Table S5.** Comparison of the theoretical and experimental weight loss of solvates in TGA.

| <b>Forms</b>                   | <b>Theoretical weight loss (%)</b> | <b>Experimental weight loss (%)</b> | <b>Desolvation temperature range (°C)</b> |
|--------------------------------|------------------------------------|-------------------------------------|-------------------------------------------|
| NIC-Monohydrate H <sub>A</sub> | 5.14                               | 5.1                                 | 73-102                                    |
| NIC-NN DMA (1:1)               | 21.0                               | 20.76                               | 86-160                                    |
| NIC-NNDMA (2:2)                | 21.0                               | 20.37                               | 76-144                                    |
| NIC-DOX (1:0.5)                | 11.86                              | 10.54                               | 76-148                                    |

**Table S6.** Desolvation and melting ranges as captured by HSM experiments recorded with 10 °C/min heating rate.

| <b>Forms</b>                     | <b>Desolvation range / °C</b> | <b>Melting range /°C</b> |
|----------------------------------|-------------------------------|--------------------------|
| NIC monohydrate - H <sub>A</sub> | 113-160                       | 201-214                  |
| NIC-DMF (1:1)                    | 106-130                       | 225-234                  |
| NIC-DMSO (1:1)                   | 120-170                       | 208-224                  |
| NIC-NNDMA (1:1)                  | 102-153                       | 227-239                  |
| NIC-NNDMA (2:2)                  | 106-146                       | 198-227                  |
| NIC-DOX (1:0.5)                  | 80-116                        | 223-239                  |
| NIC-DOX (2:1.5)                  | 46-121                        | 206-238                  |

**Table S7.** Comparison of crystal packing coefficients and crystal densities of niclosamide crystal forms.

| Forms                          | Packing Coefficient (%) | Density (g cm <sup>-3</sup> ) |
|--------------------------------|-------------------------|-------------------------------|
| <b>Anhydrous structures</b>    |                         |                               |
| NIC-Anhydrous polymorph I      | 73.9                    | 1.700                         |
| NIC-Anhydrous polymorph II     | 71.1                    | 1.646                         |
| <b>Hydrates and solvates</b>   |                         |                               |
| NIC-Monohydrate H <sub>A</sub> | 72.3                    | 1.616                         |
| NIC-Monohydrate H <sub>B</sub> | 73.4                    | 1.640                         |
| NIC-THF (1:1)                  | 71.0                    | 1.498                         |
| NIC-ACETONE (1:1)              | 72.1                    | 1.554                         |
| NIC-MeCN (1:1)                 | 74.3                    | 1.621                         |
| NIC-MeOH (1:1)                 | 73.9                    | 1.651                         |
| NIC-TEG (2:1)                  | 70.7                    | 1.506                         |
| NIC-DMF                        | 68.5                    | 1.487                         |
| NIC-DMSO                       | 68.9                    | 1.536                         |
| NIC-NNDMA (1:1)                | 68.5                    | 1.466                         |
| NIC-NNDMA (2:2)                | 68.5                    | 1.468                         |
| NIC-DOX (1:0.5)                | 68.8                    | 1.544                         |
| NIC-DOX (2:1.5)                | 68.8                    | 1.524                         |

**Table S8.** O-H...O/N interaction energies and it corresponding energy decomposition.

| Forms              | Dimer          | D...A (Å) | D - H...A (°) | $E_{ele}$<br>kJ.mol <sup>-1</sup> | $E_{pol}$<br>kJ.mol <sup>-1</sup> | $E_{dis}$<br>kJ.mol <sup>-1</sup> | $E_{rep}$<br>kJ.mol <sup>-1</sup> | $E_{total}$<br>kJ.mol <sup>-1</sup> |
|--------------------|----------------|-----------|---------------|-----------------------------------|-----------------------------------|-----------------------------------|-----------------------------------|-------------------------------------|
| NIC-I              | O4-H2...O3     | 2.693(2)  | 173(2)        | -52.6                             | -13.8                             | -24.7                             | 69.9                              | -44.2                               |
| NIC-II             | O4A-H4A...O3C  | 2.609(2)  | 168(3)        | -60.3                             | -16.2                             | -20.4                             | 76.5                              | -46.3                               |
|                    | O4B-H4B...O3D  | 2.646(2)  | 161(2)        | -52.5                             | -13.9                             | -17                               | 58                                | -44.9                               |
|                    | O4C-H4C...O3A  | 2.683(2)  | 178(3)        | -57.5                             | -16.1                             | -19.6                             | 67.2                              | -48.2                               |
|                    | O4D-H4D...O3B  | 2.659(2)  | 177(2)        | -60.6                             | -17.1                             | -20.8                             | 73.4                              | -49.5                               |
| NIC-H <sub>A</sub> | O4-H4...O1W    | 2.658(9)  | 167           | -67.9                             | -17.4                             | -6.3                              | 59.2                              | -53.5                               |
| NIC-H <sub>B</sub> | O4-H10...O5    | 2.606(3)  | 164           | -70.2                             | -17.6                             | -7.0                              | 71.2                              | -49.4                               |
| NIC-THF            | O4-H18...O5    | 2.595(7)  | 162           | -68.4                             | -21.4                             | -19.8                             | 84.1                              | -53.4                               |
| NIC-MeCN           | O4-H4...N3     | 2.782(6)  | 163           | -57.7                             | -13.1                             | -6.6                              | 52.5                              | -44.0                               |
| NIC-ACETONE (2:2)  | O4-H1...O5     | 2.652(7)  | 149(6)        | -63.1                             | -16.2                             | -17.3                             | 74                                | -48.1                               |
|                    | O9-H15...O10   | 2.687(6)  | 169(5)        | -65.7                             | -17                               | -15                               | 71                                | -51.3                               |
| NIC-MEOH           | O14-H41...O22  | 2.521(8)  | 168(6)        | -87.5                             | -24.5                             | -12.5                             | 113.1                             | -51.7                               |
| NIC-TEG (2:1)      | O8-H38...O10   | 2.655(4)  | 160           | -54.6                             | -17.9                             | -22.8                             | 68.7                              | -48.3                               |
|                    | O4-H41...O13   | 2.586(5)  | 158           | -84.8                             | -25.1                             | -18.6                             | 83                                | -73.2                               |
| NIC-DMF (1:1)      | O2-H2O...O5    | 2.569(5)  | 174(6)        | -89.6                             | -23.8                             | -10.4                             | 98.1                              | -60.8                               |
| NIC-DMSO (1:1)     | O2-H2O...O5    | 2.546(5)  | 168(3)        | -93.7                             | -25.1                             | -11.0                             | 100.5                             | -65.1                               |
| NIC-N N DMA (1:1)  | O2-H2O...O5    | 2.571(2)  | 178(3)        | -98.2                             | -27.4                             | -16.4                             | 107.5                             | -72.0                               |
| NIC-N N DMA (2:2)  | O2A-H2AO...O5A | 2.577(3)  | 179(4)        | -103.6                            | -29.4                             | -18.6                             | 117.1                             | -75.2                               |
|                    | O2B-H2BO...O5B | 2.545(6)  | 175(2)        | -106.1                            | -30.7                             | -19.7                             | 130                               | -71.7                               |
| NIC-DOX (1:0.5)    | O2-H2O...O5    | 2.589(3)  | 166(2)        | -68.3                             | -19.7                             | -18.6                             | 88.9                              | -48.0                               |
| NIC-DOX (2:1.5)    | O2A-H2AO...O5A | 2.675(6)  | 172(3)        | -58.5                             | -17.1                             | -16.1                             | 64.7                              | -48.5                               |
|                    | O2B-H2BO...O6A | 2.668(5)  | 169(4)        | -55.8                             | -16.9                             | -17.9                             | 65.4                              | -46.8                               |

$$E_{tot} = k_{ele} \cdot E_{ele} + k_{pol} \cdot E_{pol} + k_{dis} \cdot E_{dis} + k_{rep} \cdot E_{rep}$$

| Energy Model                                     | k_ele | k_pol | k_disp | k_rep |
|--------------------------------------------------|-------|-------|--------|-------|
| CE-B3LYP ... B3LYP/6-31G(d,p) electron densities | 1.057 | 0.740 | 0.871  | 0.618 |

**Table S9.** Intermolecular energies of six NIC solvates and their energy decomposition.

| Dimer                                     | $E_{\text{ele}}$ (kJ.mol <sup>-1</sup> ) | $E_{\text{pol}}$ (kJ.mol <sup>-1</sup> ) | $E_{\text{dis}}$ (kJ.mol <sup>-1</sup> ) | $E_{\text{rep}}$ (kJ.mol <sup>-1</sup> ) | $E_{\text{tot}}$ (kJ.mol <sup>-1</sup> ) |
|-------------------------------------------|------------------------------------------|------------------------------------------|------------------------------------------|------------------------------------------|------------------------------------------|
| <b>NIC-DMF(1:1)</b>                       |                                          |                                          |                                          |                                          |                                          |
| O2-H2O···O5                               | -89.6                                    | -23.8                                    | -10.4                                    | 98.1                                     | -60.8                                    |
| C10-H10···O3                              | -8.1                                     | -2                                       | -6.1                                     | 6.1                                      | -13.2                                    |
| C16-H16A···O1                             | -4.1                                     | -1.3                                     | -10.4                                    | 8                                        | -9.5                                     |
| C12-H12···C12                             | -16.4                                    | -1.2                                     | -13.8                                    | 15.2                                     | -20.8                                    |
| <b>NIC-NIC, <math>\pi\cdots\pi</math></b> | 2                                        | -2.8                                     | -84.2                                    | 42.2                                     | -47.2                                    |
| <b>NIC-DMSO(1:1)</b>                      |                                          |                                          |                                          |                                          |                                          |
| O2-H2O···O5                               | -93.7                                    | -25.1                                    | -11.0                                    | 100.5                                    | -65.1                                    |
| C15-H15B···O5                             | -16                                      | -5.3                                     | -10.2                                    | 10.2                                     | -23.5                                    |
| C4-H4···C11                               | -11.5                                    | -0.6                                     | -6.1                                     | 0                                        | -17.9                                    |
| C15-H15A···C11                            | -8.8                                     | -1.4                                     | -9                                       | 6.5                                      | -14.2                                    |
| <b>NIC-NIC, <math>\pi\cdots\pi</math></b> | -11.4                                    | -2.9                                     | -78.7                                    | 38.7                                     | -58.8                                    |
| <b>NIC-NNDMA (1:1)</b>                    |                                          |                                          |                                          |                                          |                                          |
| O2-H2O···O5                               | -98.2                                    | -27.4                                    | -16.4                                    | 107.5                                    | -72.0                                    |
| C4-H4···O3 and<br>C5-H5···O4              | -11.9                                    | -2.9                                     | -7.6                                     | 0                                        | -21.5                                    |
| C17-H17A···O4                             | -4.7                                     | -1.5                                     | -10.3                                    | 9                                        | -9.5                                     |
| <b>NIC-NIC, <math>\pi\cdots\pi</math></b> | 0                                        | -3                                       | -57.9                                    | 29.4                                     | -34.4                                    |
| Carbonyl (dipole-dipole)                  | -12.9                                    | -3.2                                     | -33.7                                    | 21.4                                     | -32.2                                    |
| <b>NIC-NNDMA (2:2)</b>                    |                                          |                                          |                                          |                                          |                                          |
| O2A-H2AO···O5A                            | -103.6                                   | -29.4                                    | -18.6                                    | 117.1                                    | -75.2                                    |
| O2B-H2BO···O5B                            | -106.1                                   | -30.7                                    | -19.7                                    | 130                                      | -71.7                                    |
| C10A-H10A···O1A                           | -11.8                                    | -3.4                                     | -21.5                                    | 16.6                                     | -23.5                                    |
| C15B-H15F···O4B                           | -8.1                                     | -1.9                                     | -6.1                                     | 8.1                                      | -10.3                                    |
| C17A-H17C···O3B                           | -8.1                                     | -1.7                                     | -10.6                                    | 11.9                                     | -11.8                                    |
| <b>NIC-NIC, <math>\pi\cdots\pi</math></b> | 1.9                                      | -3.3                                     | -59.2                                    | 27.1                                     | -35.3                                    |
|                                           | 0.8                                      | -3.5                                     | -64                                      | 29.1                                     | -39.5                                    |
|                                           | -9.1                                     | -1.9                                     | -22                                      | 10.9                                     | -23.4                                    |
|                                           | -9.3                                     | -2.7                                     | -27.4                                    | 13.3                                     | -27.5                                    |
| Carbonyl (dipole-dipole)                  | -11.2                                    | -2.9                                     | -30.8                                    | 15.5                                     | -31.2                                    |
| <b>NIC-DOX (1:0.5)</b>                    |                                          |                                          |                                          |                                          |                                          |
| O2-H2O···O5                               | -68.3                                    | -19.7                                    | -18.6                                    | 88.9                                     | -48.0                                    |
| C15-H15A···O4                             | -8.6                                     | -2.3                                     | -8.8                                     | 13.5                                     | -10.1                                    |
| C4-H4···O3                                | -13.7                                    | -1.7                                     | -5                                       | 0                                        | -20.2                                    |
| C14-H14B···O1                             | -3.3                                     | -0.9                                     | -15.4                                    | 9.1                                      | -11.9                                    |
| C12-H8···C12                              | -9.8                                     | -0.7                                     | -8                                       | 3.2                                      | -15.8                                    |
| <b>NIC-NIC, <math>\pi\cdots\pi</math></b> | -3.8                                     | -1.5                                     | -34.8                                    | 15.5                                     | -25.9                                    |
|                                           | -5.1                                     | -4.1                                     | -42.3                                    | 18.8                                     | -33.6                                    |
|                                           | -12.4                                    | -3.4                                     | -72.9                                    | 37.3                                     | -56.1                                    |



**NIC-DOX (2:1.5)**

| <b>Dimer</b>                                        | $E_{\text{ele}}$ (kJ.mol <sup>-1</sup> ) | $E_{\text{pol}}$ (kJ.mol <sup>-1</sup> ) | $E_{\text{dis}}$ (kJ.mol <sup>-1</sup> ) | $E_{\text{rep}}$ (kJ.mol <sup>-1</sup> ) | $E_{\text{tot}}$ (kJ.mol <sup>-1</sup> ) |
|-----------------------------------------------------|------------------------------------------|------------------------------------------|------------------------------------------|------------------------------------------|------------------------------------------|
| O2A-H2AO···O5A                                      | -58.5                                    | -17.1                                    | -16.1                                    | 64.7                                     | -48.5                                    |
| O2B-H2BO···O6A                                      | -55.8                                    | -16.9                                    | -17.9                                    | 65.4                                     | -46.8                                    |
| C9B-H9B···O5B                                       | -10.3                                    | -2.2                                     | -15.2                                    | 11.7                                     | -18.5                                    |
| C4B-H4B···O3A                                       | -9.9                                     | -1.8                                     | -5.6                                     | 0                                        | -16.6                                    |
| C14A-H14A···O5B                                     | -3.6                                     | -1.3                                     | -15.8                                    | 11.5                                     | -11.4                                    |
| C7B-H7B···C11A and<br>C7A-H7A···C11B                | -7.5                                     | -0.3                                     | -12                                      | 16.8                                     | -8.3                                     |
| <b>NIC-NIC, <math>\pi</math>···<math>\pi</math></b> | -13.6                                    | -3.8                                     | -86.2                                    | 45.9                                     | -63.9                                    |
|                                                     | -13                                      | -2.1                                     | -87.8                                    | 50.6                                     | -60.5                                    |
|                                                     | -10.7                                    | -2.7                                     | -85                                      | 45.1                                     | -59.5                                    |

**Table S10.** Energy contribution of the drug and solvent in the NIC anhydrous and solvate crystal structures.

| S.No | Compound Name                     | Energy contribution of Niclosamide (kJ/mol) | Energy contribution of Solvent (kJ/mol) |
|------|-----------------------------------|---------------------------------------------|-----------------------------------------|
| 1    | NIC anhydrous polymorph I         | -180.5                                      | -                                       |
| 2    | NIC anhydrous polymorph II        | -161.03                                     | -                                       |
| 3    | NIC monohydrate (H <sub>A</sub> ) | -196.4                                      | -47.05                                  |
| 4    | NIC monohydrate (H <sub>B</sub> ) | -168.5                                      | -45.3                                   |
| 5    | NIC acetonitrile (1:1)            | -169                                        | -59.25                                  |
| 6    | NIC: THF (1:1)                    | -164.4                                      | -61.3                                   |
| 7    | NIC: MeOH (1:1)                   | -186.45                                     | -49.5                                   |
| 8    | NIC Acetone (2:2)                 | -154.75                                     | -63.975                                 |
| 9    | NIC: TEG (2:1)                    | -162.55                                     | -73.4                                   |
| 10   | NIC: DMF (1:1)                    | -168.05                                     | -73.55                                  |
| 11   | NIC: DMSO (1:1)                   | -169.4                                      | -85.6                                   |
| 12   | NIC:DOX (1:0.5)                   | -152.5                                      | -44.25                                  |
| 13   | NIC: DOX (2:1.5)                  | -153.47                                     | -57.125                                 |
| 14   | NIC:NNMDA (1:1)                   | -167.45                                     | -82.6                                   |
| 15   | NIC: NNMDA (2:2)                  | -162.6                                      | -85.125                                 |

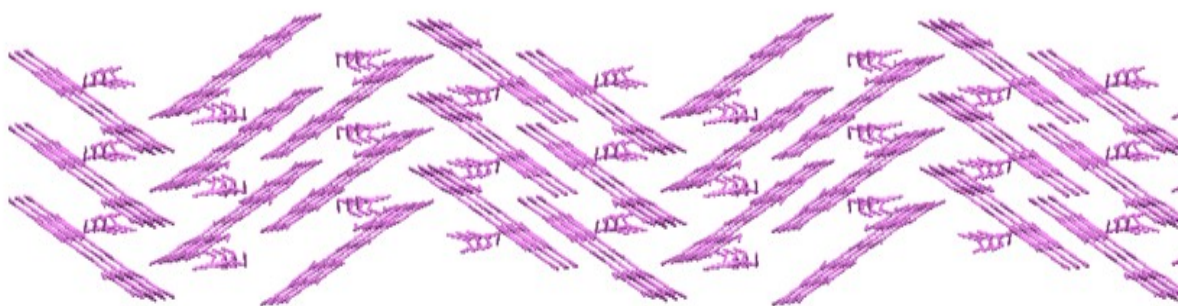

(a)

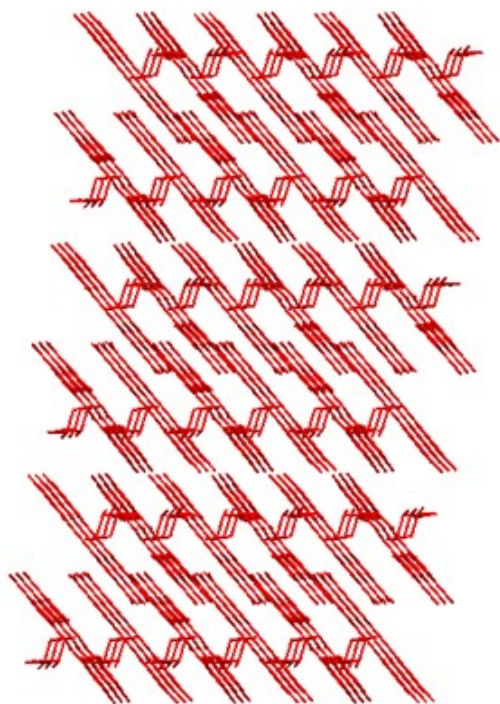

(b)

**Figure S1.** (a) crystal packing diagram of NIC-DMF (1:1) showing the zig-zag arrangement of molecules, (b) crystal packing diagram of NIC-DMSO (1:1) showing an interleaved type of arrangement.

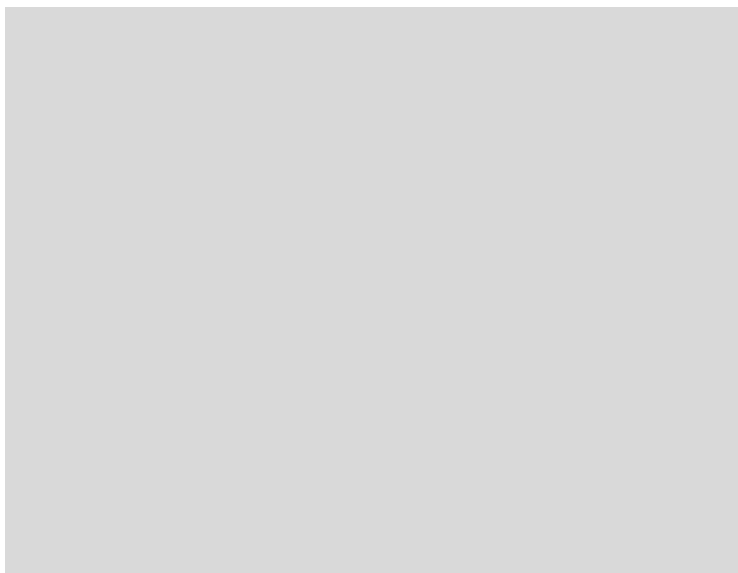

(a)

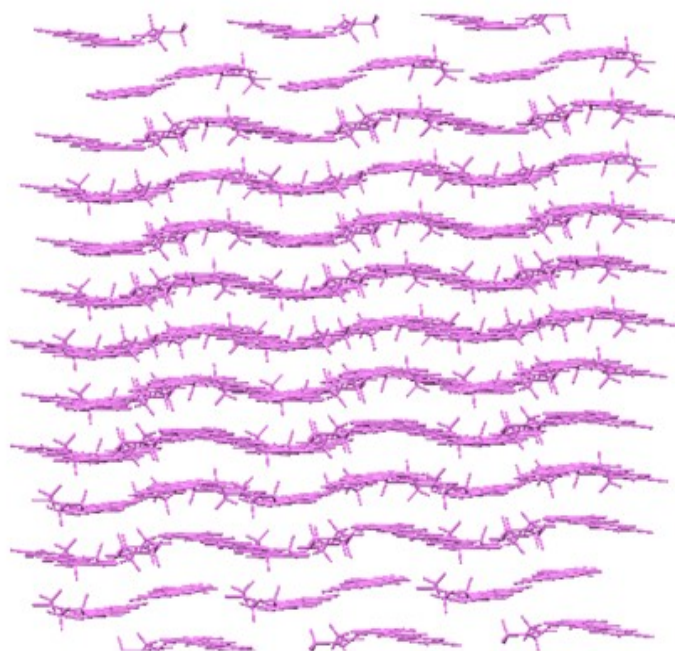

(b)

**Figure S2.** (a) crystal packing of NIC-NNDMA (1:1) form I showing the stacking of layers one above the other, (b) crystal packing of NIC-NNDMA (2:2) form II system showing the formation of a corrugated sheet type layers stacked one upon the other.

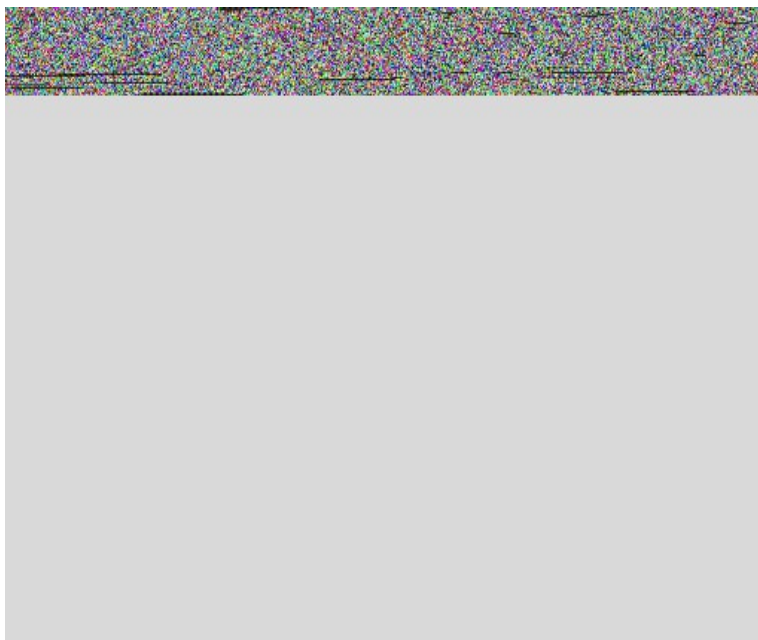

(a)

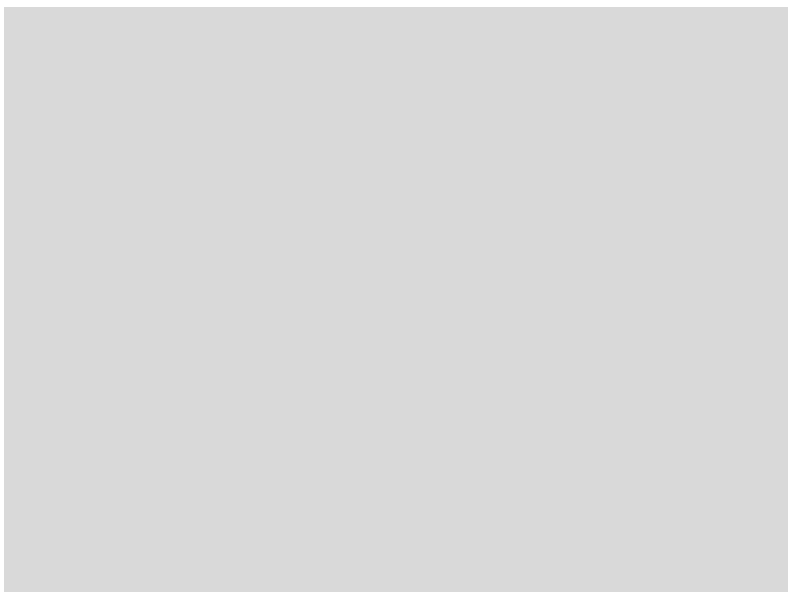

(b)

**Figure S3.** (a) crystal packing diagram of NIC-DOX (1:0.5) showing layers which are stacked one upon the other, (b) crystal packing diagram of NIC-DOX (2:1.5) showing cavities occupied by 1,4-dioxan molecules.

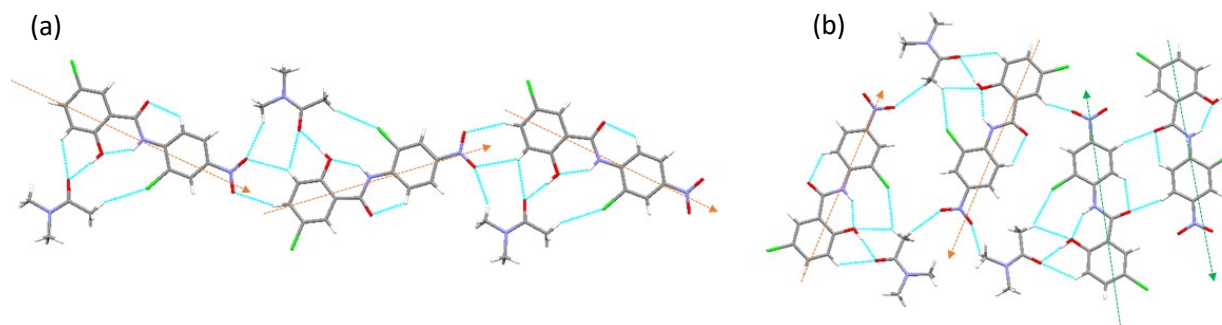

**Figure S4.** (a) showing the longitudinal alignment of NIC molecules in form I, (b) showing the antiparallel arrangement of NIC molecules in form II

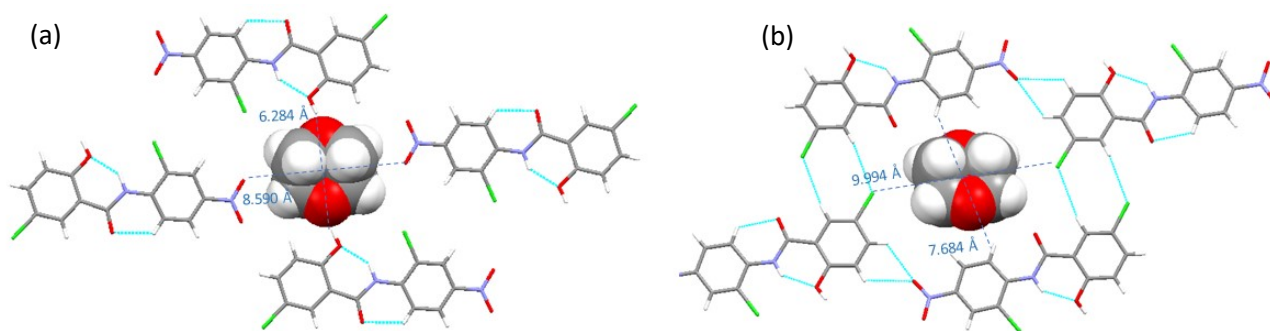

**Figure S5.** (a) shows that the void formed in NIC-DOX (1:0.5) is smaller in size (6.284 x 8.590 Å) as compared to the void in (b) NIC-DOX (2:1.5) (7.648 x 9.994Å) and hence the later hosts 1,4-dioxan solvate in the framework.

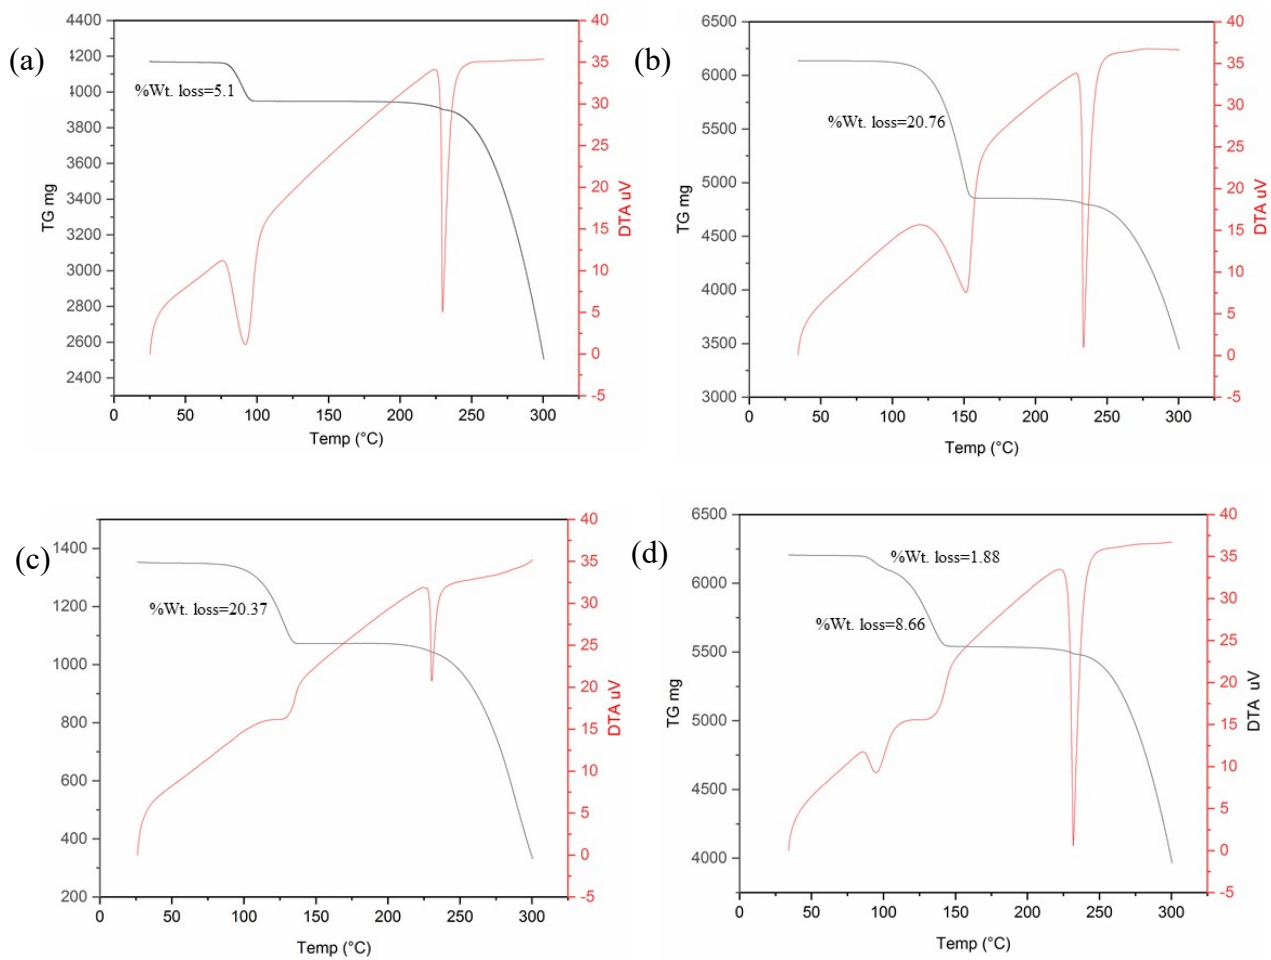

**Figure S6.** TG thermograms of (a) NIC-monohydrate, (b) NIC-NNDMA (1:1), (c) NIC-NNDMA (2:2) and (d) NIC-DOX (1:0.5)

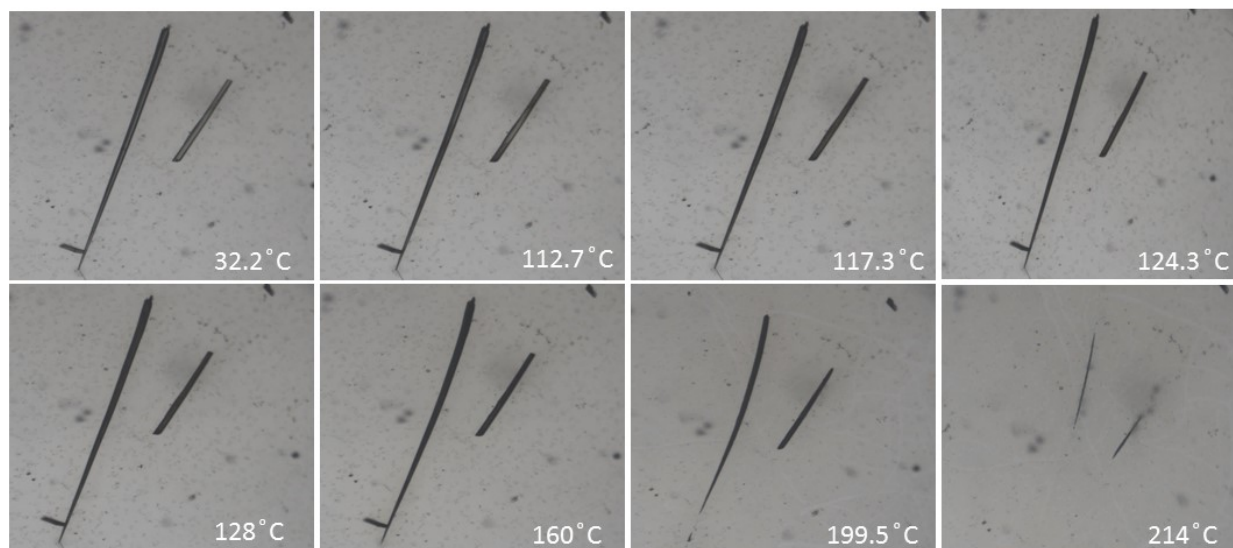

**Figure S7.** HSM images of NIC monohydrate crystals.

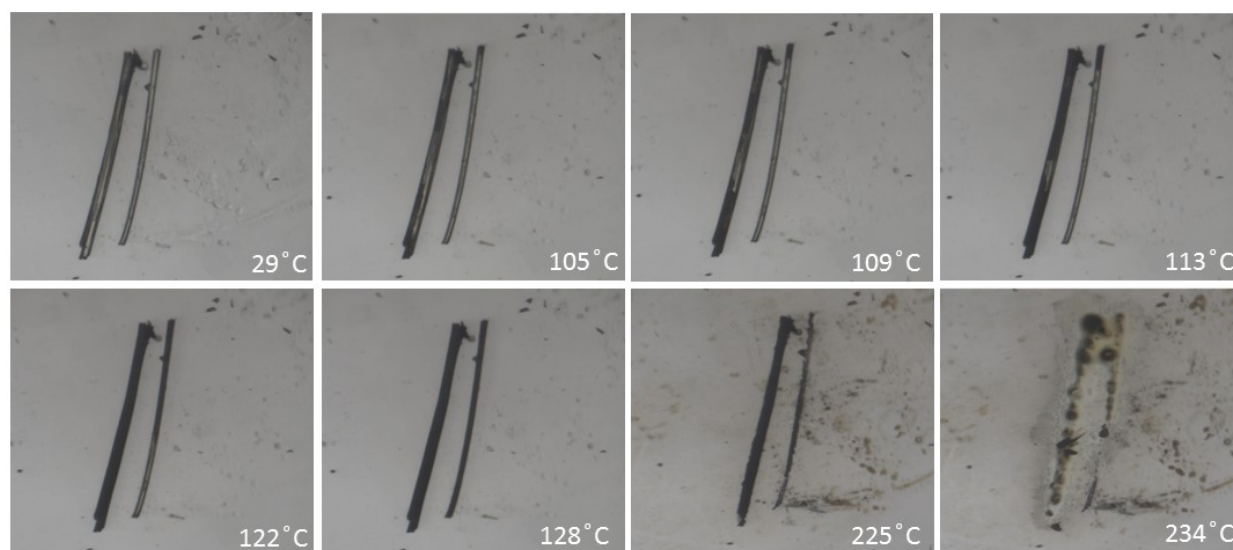

**Figure S8.** HSM images of NIC-DMF crystals.



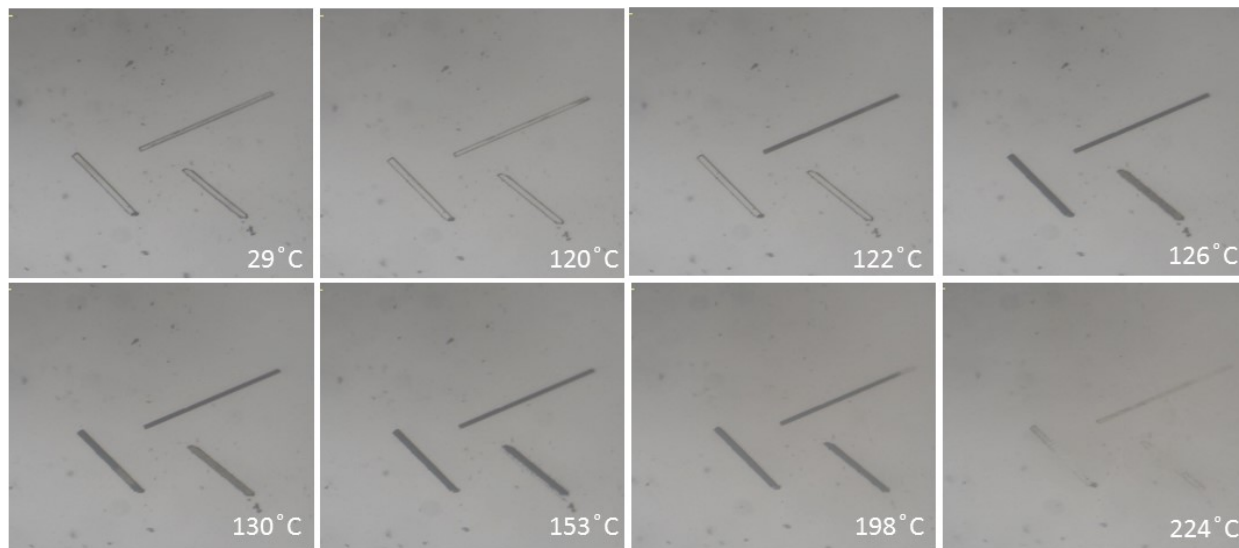

**Figure S9.** HSM images of NIC-DMSO.

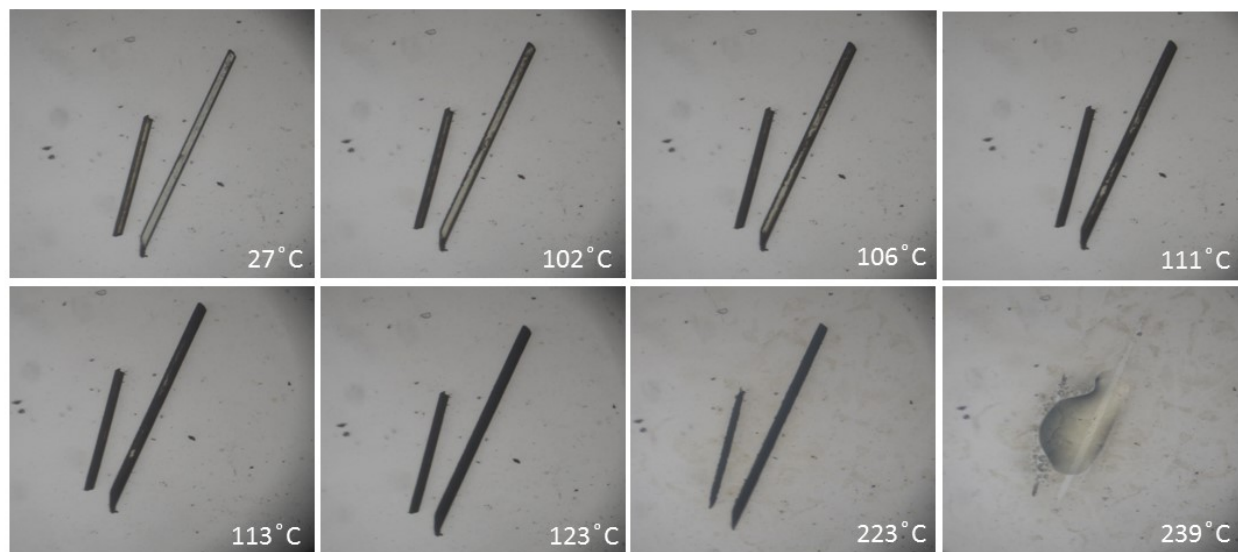

(a)

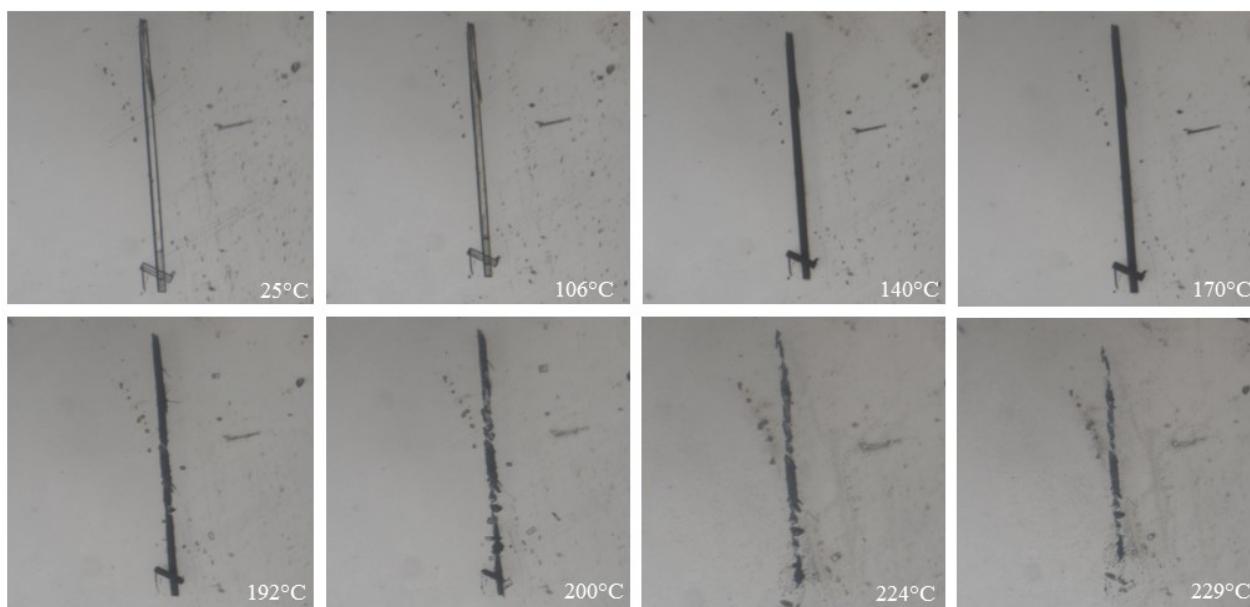

(b)

**Figure S10.** (a) HSM images of NIC-NNDMA (1:1) form I, (b) HSM images of NIC-NNDMA (2:2) form I.

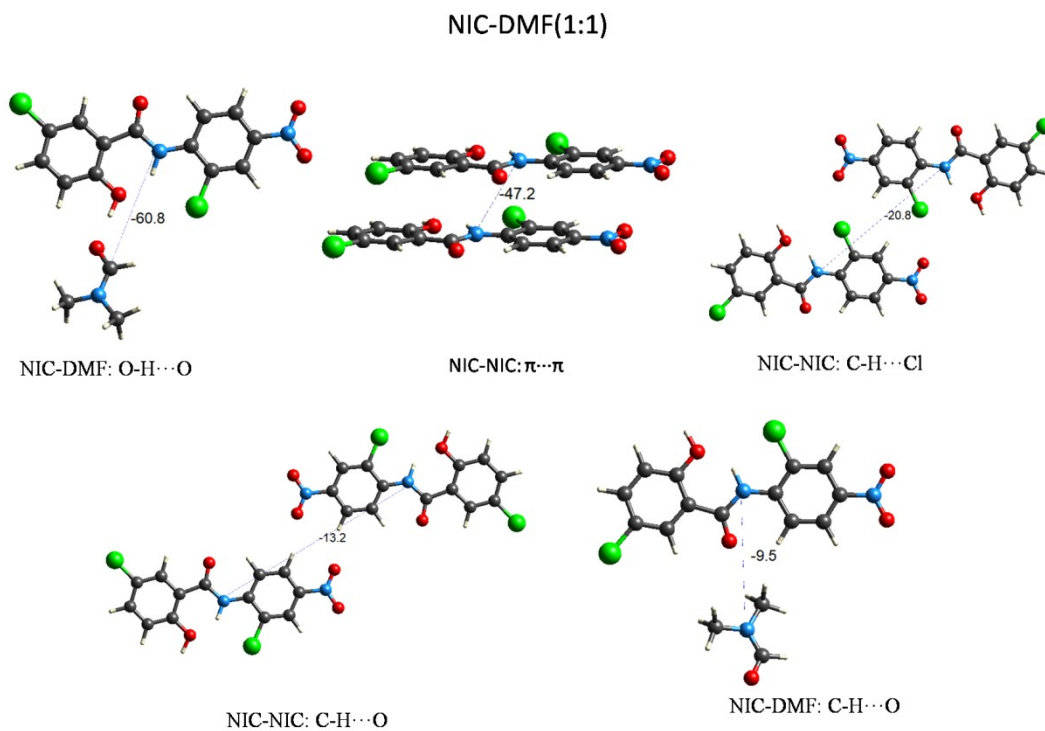

**Figure S11.** Prominent interactions in the different dimers of NIC-DMF (1:1) crystal and their associated energies ( $\text{kJ}\cdot\text{mol}^{-1}$ ).

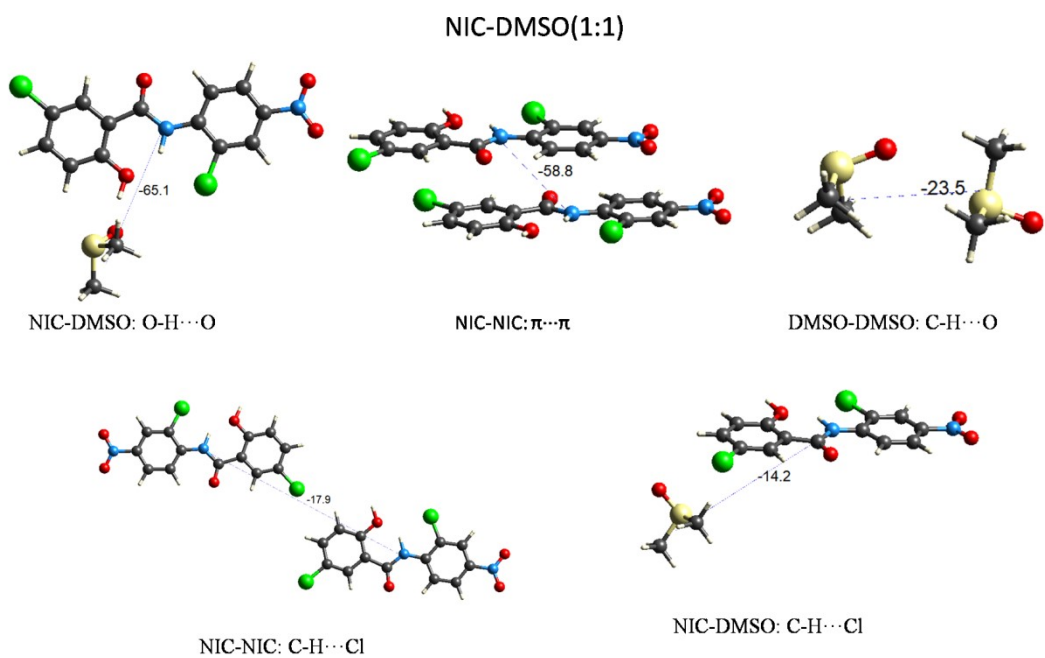

**Figure S12.** Prominent interactions in the different dimers of NIC-DMSO (1:1) crystal and their associated energies ( $\text{kJ}\cdot\text{mol}^{-1}$ ).

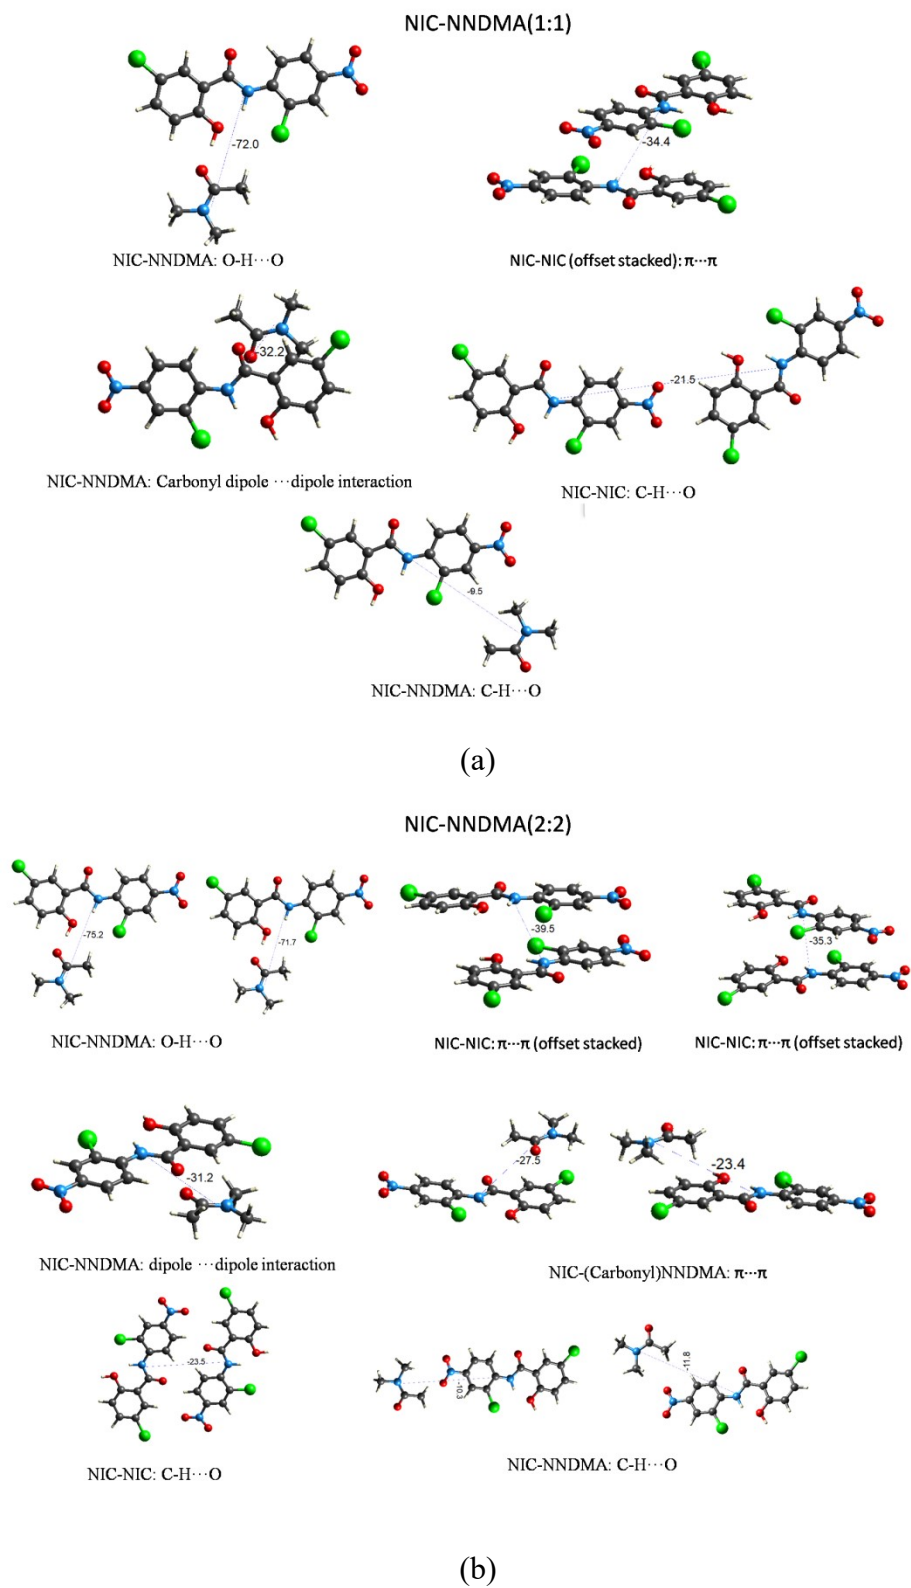

**Figure S13.** Prominent interactions in the different dimers of (a) NIC-NNDMA (1:1) and (b) NIC-NNDMA (2:2) crystal structures and their associated energies.

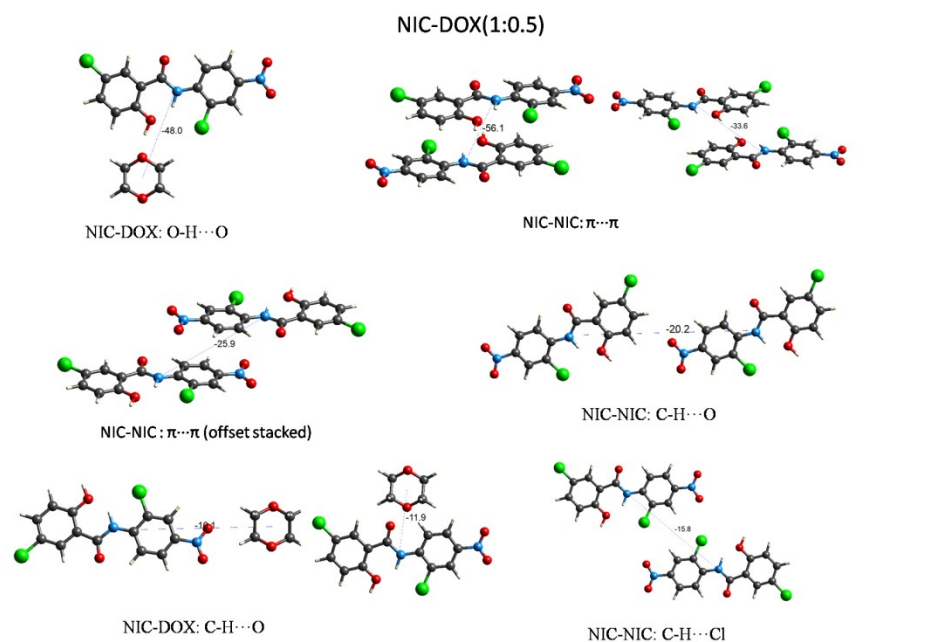

(a)

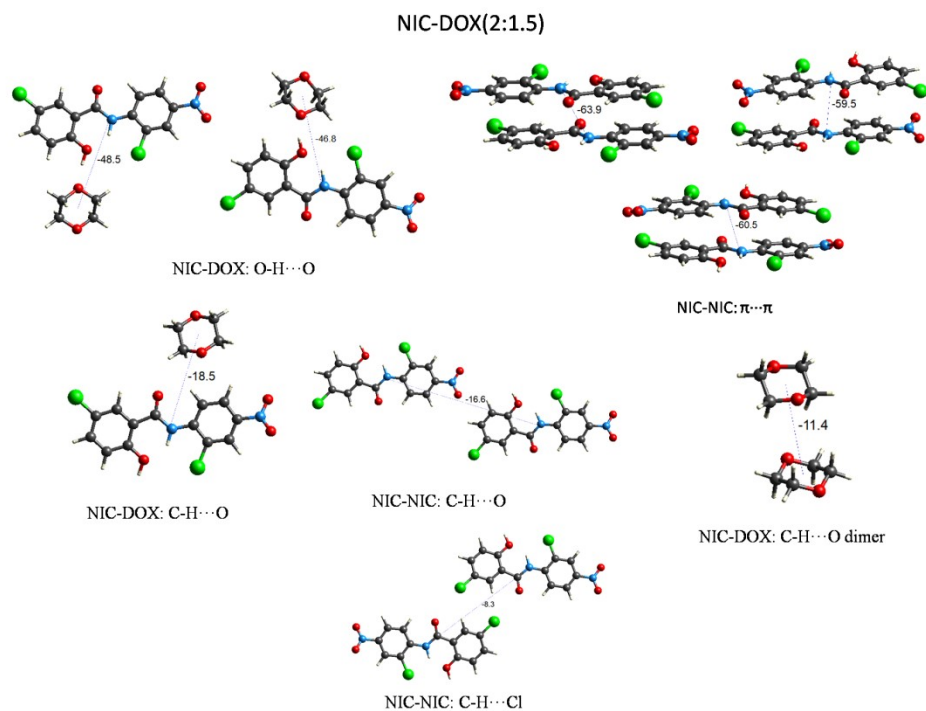

(b)

**Figure S14.** Prominent interactions in the different dimers of (a) NIC-DOX (1:0.5) and (b) NIC-DOX (2:1.5) crystal structures and their associated energies.

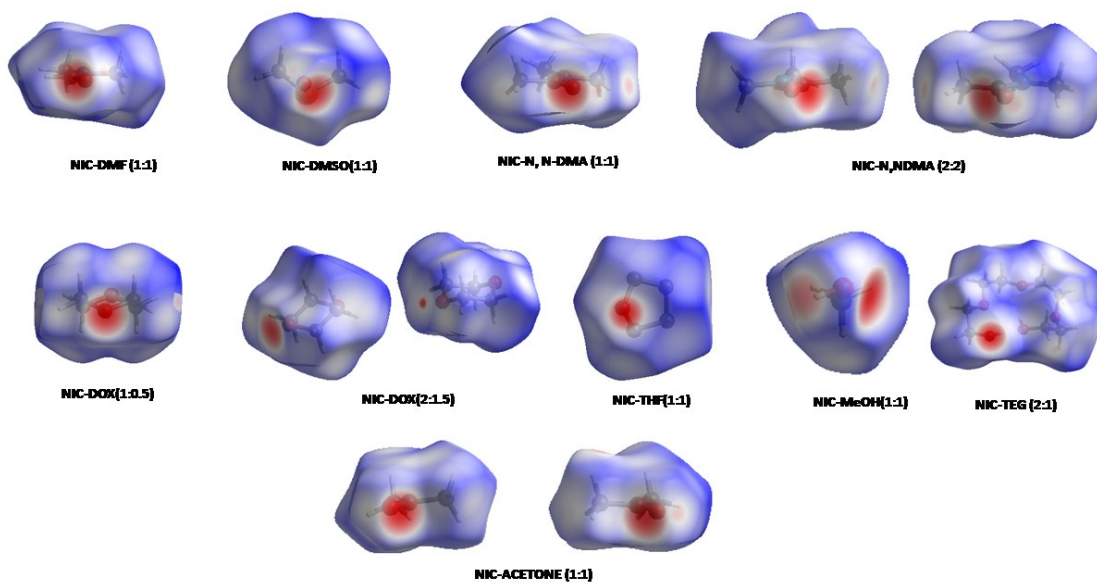

**Figure S15.** Hirshfeld surface maps with  $d_{\text{norm}}$  property mapped in NIC-DMF, NIC-DMSO, NIC-NNDMA (1:1), NIC-NNDMA (2:2) and NIC-DOX (2:1.5). Bright and large red spots indicate strong intermolecular O-H $\cdots$ O and small and faint red spots indicate C-H $\cdots$ O or other weak interactions like C-H $\cdots$  $\pi$  and  $\pi\cdots\pi$  interactions.
